# Supplementary material for: Do older and younger people differ in their reported well-being? A national survey of adults in Britain
Source: PubMed Central journal article supplement — Fam Pract. 2010 Nov 17;28(2):145–55. doi: 10.1093/fampra/cmq082 (PMC3062779; doi:10.1093/fampra/cmq082), 2010-11-17
Supplement: supp_cmq082_fampr-169-10.pdf [file supp_cmq082_fampr-169-10.pdf]

1  
2  
3  
4  
5  
6  
7  
8  
9  
10  
11  
12  
13  
14  
15  
16  
17  
18  
19  
20  
21  
22  
23  
24  
25  
26  
27  
28  
29  
30  
31  
32  
33  
34  
35  
36  
37  
38  
39  
40  
41  
42  
43  
44  
45  
46  
47  
48  
49  
50  
51  
52  
53  
54  
55  
56  
57  
58  
59  
60

**Annex of web-based supplementary files**

**www Supplementary file Table 1. What does the term 'well-being' mean to you? You can mention as many things as you like including mental or psychological and/or physical health issues, social relationships and activities, and anything else you think of. There are no right or wrong answers.**

|                                                                                                                                                                                                            | % (no)+  |
|------------------------------------------------------------------------------------------------------------------------------------------------------------------------------------------------------------|----------|
| <b>Physical health and activity:</b>                                                                                                                                                                       |          |
| Having/being in good health/physical functioning, physically fit, strong, having energy, feeling well, retaining senses - sight, hearing, not being bed bound                                              | 67 (705) |
| Keeping/staying active/mobile/able to go out/do things (including gardening, decorating, housework/domestic tasks) by moving about, not sitting too long                                                   | 4 (42)   |
| Good diet/eating well/properly/healthily/responsibly/cook properly                                                                                                                                         | 4 (37)   |
| Healthy lifestyle unspecified                                                                                                                                                                              | 3 (31)   |
| Exercising/keeping physically fit (including dancing, gym, sport, golf, tennis, bowls, physical games, walking/the dog, cycling, swimming), DIY, yoga                                                      | 2 (19)   |
| Illness/disease related: not falling, low blood pressure, low cholesterol, not being ill/sick, no aches/pains                                                                                              | 1 (12)   |
| No smoking, no heavy drinking/drink responsibly                                                                                                                                                            | ---- (3) |
| Other health                                                                                                                                                                                               | ---- (1) |
| <b>Social participation:</b>                                                                                                                                                                               |          |
| Having/doing normal activities/participate in activities, do things, keeping up one's activities, go out as much, continue to do things as before/social interaction general/meeting people/having friends | 3 (31)   |
| Going to educational or evening/other classes/open university/university of 3rd age, learning new things                                                                                                   | 1 (9)    |
| Holidays, travelling, day trips, outings, driving, sightseeing                                                                                                                                             | 1 (8)    |
| Having/attending group/organisational/community activities/societies: attending/keeping up/teaching social/supper/lunch/meals out/pub/bridge/other club                                                    | 1 (5)    |
| Other hobbies - include fishing, keep                                                                                                                                                                      | 1 (5)    |

|                                                                                                                                                                                                                                                        |          |
|--------------------------------------------------------------------------------------------------------------------------------------------------------------------------------------------------------------------------------------------------------|----------|
| birds/birdlife, wildlife, betting on horses, photography, playing instrument/having outside interests                                                                                                                                                  |          |
| Continuing to do above/things did before or years ago/normal activities/participate in activities, do things, keeping up one's activities, go out as much, continue to do things as before, meeting people, having friends                             | ---- (4) |
| Keeping busy, doing things and not sitting indoors/watching TV, keeping up activities, hobbies                                                                                                                                                         | ---- (4) |
| Being able to fast for religion/pray/observe religious festivals/being close to God                                                                                                                                                                    | ---- (4) |
| Having pets                                                                                                                                                                                                                                            | ---- (3) |
| Having social roles, involvement in/contribute to community, choir, committees, church work etc/voluntary/charity/community work                                                                                                                       | ---- (2) |
| Listening/watching TV/radio/music/talking books, videos, DVDs, sport                                                                                                                                                                                   | ---- (2) |
| Shopping, retail, therapy, market                                                                                                                                                                                                                      | ---- (1) |
| Doing crafts (knitting, sewing art, similar)                                                                                                                                                                                                           | ---- (1) |
| Other leisure/social roles                                                                                                                                                                                                                             | ---- (2) |
| <b>Mental health and functioning</b>                                                                                                                                                                                                                   |          |
| Mental fitness, maintaining concentration, not losing memory                                                                                                                                                                                           | 13 (133) |
| Exercising mind/mental alertness/keeping mind occupied, keeping brain working (by crosswords, puzzles, sudoku, reading, jigsaw puzzles, words, bingo)                                                                                                  | ---- (4) |
| Other mental                                                                                                                                                                                                                                           | ---- (1) |
| <b>Psychological resources/outlook:</b>                                                                                                                                                                                                                |          |
| Life satisfaction, enjoyment, enjoying life, happiness, being happy not depressed                                                                                                                                                                      | 21 (220) |
| Positive thinking, outlook/good/attitude to life/state of mind, keeping sense of humour, staying focused, not worrying, self confidence, less stress, get up and do it, think positive, have a purpose in life, taking on challenges, being in control | 19 (200) |
| Having dignity, having wisdom, being respected                                                                                                                                                                                                         | 1 (9)    |
| Maintaining interest in life/contemporary world/politics/engaging in world                                                                                                                                                                             | ---- (1) |
| Having/keeping/not losing confidence/self esteem/not losing confidence to go out, do things                                                                                                                                                            | ---- (1) |
| <b>Social contact/support:</b>                                                                                                                                                                                                                         |          |

|                                                                                                                                                                                                                                                                                                                                                             |                                                                                                                                                         |          |
|-------------------------------------------------------------------------------------------------------------------------------------------------------------------------------------------------------------------------------------------------------------------------------------------------------------------------------------------------------------|---------------------------------------------------------------------------------------------------------------------------------------------------------|----------|
| 1<br>2<br>3<br>4<br>5<br>6<br>7<br>8<br>9<br>10<br>11<br>12<br>13<br>14<br>15<br>16<br>17<br>18<br>19<br>20<br>21<br>22<br>23<br>24<br>25<br>26<br>27<br>28<br>29<br>30<br>31<br>32<br>33<br>34<br>35<br>36<br>37<br>38<br>39<br>40<br>41<br>42<br>43<br>44<br>45<br>46<br>47<br>48<br>49<br>50<br>51<br>52<br>53<br>54<br>55<br>56<br>57<br>58<br>59<br>60 | Seeing/meeting/visiting/entertaining/going out with/being with family, grandchildren                                                                    | 9 (98)   |
|                                                                                                                                                                                                                                                                                                                                                             | Seeing/meeting/visiting/entertaining/going out with/being with friends (including neighbours)                                                           | 4 (40)   |
|                                                                                                                                                                                                                                                                                                                                                             | Having someone (e.g. family, friend) to help one/to do things/comfort/love/being close to/care about or look out for one                                | 6 (61)   |
|                                                                                                                                                                                                                                                                                                                                                             | Contributing to family life/being a good wife, looking after someone/caring for/helping someone ill/frail/old/looking after grandchildren/children      | 1 (14)   |
|                                                                                                                                                                                                                                                                                                                                                             | Meetings lots of other people, having social connections/not having to stay at home/sitting around                                                      | 4 (40)   |
|                                                                                                                                                                                                                                                                                                                                                             | <b>Independence/control/freedom:</b>                                                                                                                    |          |
|                                                                                                                                                                                                                                                                                                                                                             | Being able to continue to do same things always done, live the way want to, remaining independent, be able to drive car, able to do own tasks, shopping | 7 (70)   |
|                                                                                                                                                                                                                                                                                                                                                             | To remain independent etc to be able to do what one enjoys, get out, enjoy self, doing what one wants, as wishes, doing one's own things                | 4 (45)   |
|                                                                                                                                                                                                                                                                                                                                                             | Continue to live in own home                                                                                                                            | 3 (29)   |
|                                                                                                                                                                                                                                                                                                                                                             | To be in control of yourself/life, to make own decisions                                                                                                | 1 (9)    |
|                                                                                                                                                                                                                                                                                                                                                             | Remaining independent as possible                                                                                                                       | 1 (15)   |
|                                                                                                                                                                                                                                                                                                                                                             | Other independence/freedom                                                                                                                              | ---- (1) |
|                                                                                                                                                                                                                                                                                                                                                             | <b>Financial/standard of living:</b>                                                                                                                    |          |
|                                                                                                                                                                                                                                                                                                                                                             | Financial security, independence, adequate/sufficient income/pension (including for food, bills, transport) no money worries/problems                   | 19 (201) |
|                                                                                                                                                                                                                                                                                                                                                             | Staying in work/paid employment as long as possible                                                                                                     | 6 (67)   |
|                                                                                                                                                                                                                                                                                                                                                             | Comfortable living, good standard of living                                                                                                             | 5 (50)   |
|                                                                                                                                                                                                                                                                                                                                                             | Having enough money to enjoy life/enjoy being old/to buy little presents/entertainment/having nice clothes                                              | 1 (12)   |
|                                                                                                                                                                                                                                                                                                                                                             | Receiving social security/benefits/pension credits, discounted social services, discounted facilities                                                   | 1 (11)   |
|                                                                                                                                                                                                                                                                                                                                                             | Has access to car/can drive/afford petrol                                                                                                               | ---- (1) |
|                                                                                                                                                                                                                                                                                                                                                             | <b>Neighbourhood environment:</b>                                                                                                                       |          |
|                                                                                                                                                                                                                                                                                                                                                             | Security when going out/being safe in neighbourhood                                                                                                     | 3 (30)   |
|                                                                                                                                                                                                                                                                                                                                                             | Access to good/free healthcare, doctor, medical services, preventive care, prescriptions                                                                | 3 (27)   |

|                                                                                                         |             |
|---------------------------------------------------------------------------------------------------------|-------------|
| Neighbourliness, good neighbours/community                                                              | 2 (21)      |
| Availability/access to buses, trains, public transport                                                  | 1 (5)       |
| Access to local services, libraries, facilities/services                                                | 1 (9)       |
| Access to leisure facilities/exercise classes/education, open footpaths etc                             | ---- (1)    |
| Availability of assistance (with mobility, personal advice, housing, transport, domestic/home care etc) | ---- (1)    |
| <b>Other (e.g. 'growing old gracefully)</b>                                                             | 1 (11)      |
| <b>Don't know</b>                                                                                       | 1 (10)      |
| <b>No. of respondents</b>                                                                               | <b>1049</b> |

*Totals do not equal 100% as respondents could mention more than One theme; each theme coded once per respondent*

| <b>Supplementary file Table 2. In your opinion, how can the general and mental well-being of older people be improved?</b>                    |               |
|-----------------------------------------------------------------------------------------------------------------------------------------------|---------------|
|                                                                                                                                               | <b>% (no)</b> |
| <b>Physical health:</b>                                                                                                                       |               |
| Improve/increase physical activity/exercises                                                                                                  | 5 (52)        |
| Improve/increase physical health/mobility/physical functioning                                                                                | 2 (20)        |
| Improve diet                                                                                                                                  | 1 (15)        |
| <b>Mental health:</b>                                                                                                                         |               |
| Improve/increase mental activity/exercises/keeping brain active inc crosswords, stimulation, learning new things, technology, classes/hobbies | 7 (74)        |
| Improve mental health/memory/functioning                                                                                                      | 1 (4)         |
| <b>Economic:</b>                                                                                                                              |               |
| Having more money/pension/financial security/not worrying about money                                                                         | 14 (146)      |
| Continue in paid work                                                                                                                         | 1 (10)        |
| <b>Independence:</b>                                                                                                                          |               |
| Improve/increase independence/ability to stay in own home                                                                                     | 5 (52)        |
| <b>Social participation, roles, contact and support:</b>                                                                                      |               |
| More/having social support/having someone to look out for you/help/good support network, someone to turn to                                   | 22 (233)      |
| More social activities/participation/opportunities/mixing/facilities/groups to meet people, not being left alone/on one's own                 | 17 (179)      |
| Keeping occupied/busy/give people something to do/things to do                                                                                | 2 (24)        |
| A role/contribute to community                                                                                                                | 2 (18)        |
| Reduce loneliness                                                                                                                             | 1 (15)        |
| Neighbourliness                                                                                                                               | 1 (10)        |
| Day trips/days out                                                                                                                            | 1 (8)         |
| <b>Services, home and neighbourhood:</b>                                                                                                      |               |
| Good/better/adequate access to services - health, social, community, home care/help in home                                                   | 28 (298)      |
| Living in a good neighbourhood/better neighbourhood security/facilities/reduce crime                                                          | 3 (28)        |
| Better transport                                                                                                                              | 2 (20)        |
| Having more sheltered housing                                                                                                                 | 1 (9)         |
| Having/home adaptations/home improvements                                                                                                     | ---- (3)      |
| <b>Psychological:</b>                                                                                                                         |               |
| Improve society's attitudes to older people/more respect/feeling valued/important/understanding                                               | 9 (99)        |
| Improving psychological outlook - work-life balance, life satisfaction, optimism, peaceful, acceptance                                        | 3 (29)        |
| Improve self esteem, confidence, feeling of control in life                                                                                   | 1 (14)        |
| <b>Other (e.g. depends on living circumstances)</b>                                                                                           | 1 (13)        |
| <b>Don't know</b>                                                                                                                             | 10 (112)      |
| <b>No. of respondents</b>                                                                                                                     | <b>1049</b>   |

*Totals do not equal 100% as respondents could mention more than one theme; each theme coded once per respondent*

| <b>www Supplementary file Table 3. Well-being, health and social circumstances</b>                                                                                      |              |
|-------------------------------------------------------------------------------------------------------------------------------------------------------------------------|--------------|
|                                                                                                                                                                         | <b>% (n)</b> |
| <b>Overall, would you say your own well-being was:</b>                                                                                                                  |              |
| <b>1 Very good</b>                                                                                                                                                      | 36 (369)     |
| <b>2 Good</b>                                                                                                                                                           | 42 (433)     |
| <b>3 Alright</b>                                                                                                                                                        | 18 (190)     |
| <b>4 Bad</b>                                                                                                                                                            | 3 (31)       |
| <b>5 Very bad</b>                                                                                                                                                       | 1 (9)        |
|                                                                                                                                                                         | <b>1032</b>  |
| <i>Mean (standard deviation):</i>                                                                                                                                       |              |
| <i>Female 1.87 (0.863),</i>                                                                                                                                             |              |
| <i>Male 1.85 (0.798),</i>                                                                                                                                               |              |
| <i>2-tailed t-test: 0.318;</i>                                                                                                                                          |              |
| <i>P= 0.317 ns</i>                                                                                                                                                      |              |
| <i>Age &lt;65 1.85 (0.831),</i>                                                                                                                                         |              |
| <i>Age 65+ 1.91 (0.842),</i>                                                                                                                                            |              |
| <i>2-tailed t-test: 1.080; P=0.280 ns</i>                                                                                                                               |              |
| <i>Spearman's correlation with continuous age: r=0.047 ns</i>                                                                                                           |              |
| <b>Please rate your mental well-being, would you say your mental well-being was:</b>                                                                                    |              |
| <b>1 Very good</b>                                                                                                                                                      | 40 (414)     |
| <b>2 Good</b>                                                                                                                                                           | 40 (412)     |
| <b>3 Alright</b>                                                                                                                                                        | 17 (174)     |
| <b>4 Bad</b>                                                                                                                                                            | 2 (21)       |
| <b>5 Very bad</b>                                                                                                                                                       | 1 (6)        |
|                                                                                                                                                                         | <b>1027</b>  |
| <i>Mean (standard deviation):</i>                                                                                                                                       |              |
| <i>Female 1.79 (0.802),</i>                                                                                                                                             |              |
| <i>Male 1.77 (0.790),</i>                                                                                                                                               |              |
| <i>2-tailed t-test: 0.416; P= 0.968 ns</i>                                                                                                                              |              |
| <i>Age &lt;65 1.77 (0.798),</i>                                                                                                                                         |              |
| <i>Age 65+ 1.79 (0.791),</i>                                                                                                                                            |              |
| <i>2-tailed t-test: -0.312; P=0.755 ns</i>                                                                                                                              |              |
| <i>Spearman's correlation with continuous age: r=0.037 ns</i>                                                                                                           |              |
| <b>In general, how satisfied are you with your life as a whole these days? Please rate your satisfaction on a scale of 1 to 10, with 1 being low and 10 being high:</b> |              |
| <b>1</b>                                                                                                                                                                | --- (4)      |
| <b>2</b>                                                                                                                                                                | --- (4)      |
| <b>3</b>                                                                                                                                                                | 1 (11)       |
| <b>4</b>                                                                                                                                                                | 2 (23)       |

|                                                                                                                                                                                                                    |             |
|--------------------------------------------------------------------------------------------------------------------------------------------------------------------------------------------------------------------|-------------|
| <b>5</b>                                                                                                                                                                                                           | 5 (55)      |
| <b>6</b>                                                                                                                                                                                                           | 8 (78)      |
| <b>7</b>                                                                                                                                                                                                           | 18 (178)    |
| <b>8</b>                                                                                                                                                                                                           | 31 (320)    |
| <b>9</b>                                                                                                                                                                                                           | 19 (192)    |
| <b>10</b>                                                                                                                                                                                                          | 16 (167)    |
|                                                                                                                                                                                                                    | <b>1032</b> |
| <i>Mean (standard deviation):</i>                                                                                                                                                                                  |             |
| <i>Female 7.87 (1.674),</i>                                                                                                                                                                                        |             |
| <i>Male 7.79 (1.608),</i>                                                                                                                                                                                          |             |
| <i>2-tailed t-test: 0.753; P= 0.471 ns</i>                                                                                                                                                                         |             |
| <i>Age &lt;65 7.81 (1.625),</i>                                                                                                                                                                                    |             |
| <i>Age 65+ 7.94 (1.708),</i>                                                                                                                                                                                       |             |
| <i>2-tailed t-test: -1.026; P=0.305 ns</i>                                                                                                                                                                         |             |
| <i>Spearman's correlation with continuous age: r=0.037 ns</i>                                                                                                                                                      |             |
| <b>All things considered, How happy would you say you are</b> ( <i>direction of wording in questionnaire reversed to prevent response set, but reverse coded in office so direction matched other questions</i> ): |             |
| <b>4 Not at all happy</b>                                                                                                                                                                                          | --- (3)     |
| <b>3 Not very happy</b>                                                                                                                                                                                            | 5 (51)      |
| <b>2 Quite happy</b>                                                                                                                                                                                               | 49 (493)    |
| <b>1 Very happy</b>                                                                                                                                                                                                | 46 (472)    |
|                                                                                                                                                                                                                    | <b>1018</b> |
| <i>Mean (standard deviation):</i>                                                                                                                                                                                  |             |
| <i>Female 1.57 (0.594),</i>                                                                                                                                                                                        |             |
| <i>Male 1.62 (0.602),</i>                                                                                                                                                                                          |             |
| <i>2-tailed t-test: -1.431; P= 0.926 ns</i>                                                                                                                                                                        |             |
| <i>Age &lt;65 1.59 (0.592),</i>                                                                                                                                                                                    |             |
| <i>Age 65+ 1.59 (0.619),</i>                                                                                                                                                                                       |             |
| <i>2-tailed t-test: -0.003; P=0.998 ns</i>                                                                                                                                                                         |             |
| <i>Spearman's correlation with continuous age: r=0.043 ns</i>                                                                                                                                                      |             |
| <b>Thinking about both the good and bad things that make up your quality of life, how would you rate the quality of your life as a whole?</b>                                                                      |             |
| <b>1 Very good</b>                                                                                                                                                                                                 | 33 (343)    |
| <b>2 Good</b>                                                                                                                                                                                                      | 46 (483)    |
| <b>3 Alright</b>                                                                                                                                                                                                   | 18 (182)    |
| <b>4 Bad</b>                                                                                                                                                                                                       | 2 (23)      |
| <b>5 Very bad</b>                                                                                                                                                                                                  | 1 (5)       |
|                                                                                                                                                                                                                    | <b>1036</b> |
| <i>Mean (standard deviation):</i>                                                                                                                                                                                  |             |
| <i>Female 1.84 (0.789),</i>                                                                                                                                                                                        |             |

|                                                                                                                                                                                                                                                                                            |             |
|--------------------------------------------------------------------------------------------------------------------------------------------------------------------------------------------------------------------------------------------------------------------------------------------|-------------|
| <p>Male 1.84 (0.750),<br/>2-tailed t-test: 0.141; P= 0.417 ns</p> <p>Age &lt;65 1.84 (0.771),<br/>Age 65+ 1.84 (0.774),<br/>2-tailed t-test: -0.061; P= 0.951 ns</p> <p>Spearman's correlation with<br/>continuous age: r=0.051 ns</p>                                                     |             |
| <b>Are you able to walk at least 400 yards (approx. 350 metres):</b>                                                                                                                                                                                                                       |             |
| <b>1 No difficulty</b>                                                                                                                                                                                                                                                                     | 85 (885)    |
| <b>2 Some difficulty</b>                                                                                                                                                                                                                                                                   | 9 (94)      |
| <b>3 Can do with help of aid or appliance</b>                                                                                                                                                                                                                                              | 3 (27)      |
| <b>4 Unable to do</b>                                                                                                                                                                                                                                                                      | 3 (35)      |
|                                                                                                                                                                                                                                                                                            | <b>1041</b> |
| <p>Mean (standard deviation):</p> <p>Female 1.23 (0.679),<br/>Male 1.17 (0.522),<br/>2-tailed t-test: 1.649; P= 0.001</p> <p>Age &lt;65 1.13 (0.491),<br/>Age 65+ 1.49 (0.873),<br/>2-tailed t-test: -8.001 P=0.001</p> <p>Spearman's correlation with<br/>continuous age: r=0.302**</p>   |             |
| <b>Are you able to do heavy housework:</b>                                                                                                                                                                                                                                                 |             |
| <b>1 No difficulty</b>                                                                                                                                                                                                                                                                     | 77 (800)    |
| <b>2 Some difficulty</b>                                                                                                                                                                                                                                                                   | 13 (135)    |
| <b>3 Can do with help of aid or appliance</b>                                                                                                                                                                                                                                              | 1 (13)      |
| <b>4 Unable to do</b>                                                                                                                                                                                                                                                                      | 9 (93)      |
|                                                                                                                                                                                                                                                                                            | <b>1041</b> |
| <p>Mean (standard deviation):</p> <p>Female 1.41 (0.900),<br/>Male 1.32 (0.789),<br/>2-tailed t-test: 1.750; P= 0.001</p> <p>Age &lt;65 1.21 (0.642),<br/>Age 65+ 1.95 (0.199),<br/>2-tailed t-test: -12.272; P=0.001</p> <p>Spearman's correlation with<br/>continuous age: r=0.394**</p> |             |
| <b>Are you able to go shopping and carry heavy bags:</b>                                                                                                                                                                                                                                   |             |
| <b>1 No difficulty</b>                                                                                                                                                                                                                                                                     | 77 (786)    |
| <b>2 Some difficulty</b>                                                                                                                                                                                                                                                                   | 12 (127)    |
| <b>3 Can do with help of aid or appliance</b>                                                                                                                                                                                                                                              | 3 (28)      |
| <b>4 Unable to do</b>                                                                                                                                                                                                                                                                      | 10 (100)    |
|                                                                                                                                                                                                                                                                                            | <b>1041</b> |



|                                                                                                                                                                                                                                                                                       |             |
|---------------------------------------------------------------------------------------------------------------------------------------------------------------------------------------------------------------------------------------------------------------------------------------|-------------|
| Mean (standard deviation):<br><br>Female 1.49 (0.972),<br>Male 1.30 (0.764),<br>2-tailed t-test: 3.455; P= 0.0001<br><br>Age <65 1.125 (0.716),<br>Age 65+ 1.97 (1.177),<br>2-tailed t-test: -11.36 P=0.001<br><br><i>Spearman's correlation with<br/>continuous age: r=0.396**</i>   |             |
| <b>Are you able to go up and down<br/>stairs or steps:</b>                                                                                                                                                                                                                            |             |
| <b>1 No difficulty</b>                                                                                                                                                                                                                                                                | 83 (866)    |
| <b>2 Some difficulty</b>                                                                                                                                                                                                                                                              | 11 (113)    |
| <b>3 Can do with help of aid or<br/>appliance</b>                                                                                                                                                                                                                                     | 2 (25)      |
| <b>4 Unable to do</b>                                                                                                                                                                                                                                                                 | 4 (36)      |
|                                                                                                                                                                                                                                                                                       | <b>1040</b> |
| Mean (standard deviation):<br><br>Female 1.25 (0.666),<br>Male 1.20 (0.583),<br>2-tailed t-test: 1.229; P= 0.019<br><br>Age <65 1.12 (0.474),<br>Age 65+ 1.60 (0.916),<br>2-tailed t-test: -10.61; P=0.001<br><br><i>Spearman's correlation with<br/>continuous age: r=0.352**</i>    |             |
| <b>How is your health in general:</b>                                                                                                                                                                                                                                                 |             |
| <b>1 Very good</b>                                                                                                                                                                                                                                                                    | 37 (388)    |
| <b>2 Good</b>                                                                                                                                                                                                                                                                         | 40 (416)    |
| <b>3 Fair</b>                                                                                                                                                                                                                                                                         | 16 (170)    |
| <b>4 Bad</b>                                                                                                                                                                                                                                                                          | 6 (60)      |
| <b>5 Very bad</b>                                                                                                                                                                                                                                                                     | 1 (12)      |
|                                                                                                                                                                                                                                                                                       | <b>1046</b> |
| Mean (standard deviation):<br><br>Female 1.89 (0.905),<br>Male 1.89 (0.873),<br>2-tailed t-test: 0.010; P= 0.755 ns<br><br>Age <65 1.78 (0.832),<br>Age 65+ 2.32 (0.962),<br>2-tailed t-test: -8.453; P=0.001<br><br><i>Spearman's correlation with<br/>continuous age: r=0.289**</i> |             |
| <b>In general, compared with other<br/>people your age, how would you rate<br/>your current health? MCT_7</b>                                                                                                                                                                         | 20 (206)    |
| <b>1 Excellent</b>                                                                                                                                                                                                                                                                    | 38 (388)    |

|                                                                                     |             |
|-------------------------------------------------------------------------------------|-------------|
| <b>2 Very good</b>                                                                  | 27 (282)    |
| <b>3 Good</b>                                                                       | 11 (116)    |
| <b>4 Fair</b>                                                                       | 4 (43)      |
| <b>5 Poor</b>                                                                       | <b>1035</b> |
| <i>Mean (standard deviation):</i>                                                   |             |
| <i>Female 2.36 (1.038),</i>                                                         |             |
| <i>Male 2.37 (1.011),</i>                                                           |             |
| <i>2-tailed t-test: -0.106; P= 0.598 ns</i>                                         |             |
| <i>Age &lt;65 2.33 (1.017),</i>                                                     |             |
| <i>Age 65+ 2.47 (1.048),</i>                                                        |             |
| <i>2-tailed t-test: -1.868; P=0.062 ns</i>                                          |             |
| <i>Spearman's correlation with</i>                                                  |             |
| <i>continuous age: r=0.071*</i>                                                     |             |
| <b>Longstanding illness, disability, infirmity: LSIII</b>                           |             |
| <b>Yes</b>                                                                          | 36 (373)    |
| <b>No</b>                                                                           | 64 (673)    |
|                                                                                     | <b>1046</b> |
| <i>Female 34% (190),</i>                                                            |             |
| <i>Male 34% (160),</i>                                                              |             |
| <i>Chi.sq. 0.006, 1df, P=0.937 ns</i>                                               |             |
| <i>Age 16-44 17% (74),</i>                                                          |             |
| <i>45-64 36% (141),</i>                                                             |             |
| <i>65+ 60% (135),</i>                                                               |             |
| <i>Chi-sq. 121.642, 2df, P=0.001</i>                                                |             |
| <i>Spearman's correlation with</i>                                                  |             |
| <i>continuous age: r=0.289**</i>                                                    |             |
| <b>IF YES: Does this illness or disability limit your activities in any way?</b>    |             |
| <b>Yes</b>                                                                          | 57 (214)    |
| <b>No</b>                                                                           | 43 (159)    |
|                                                                                     | <b>673</b>  |
| <i>Female 61% (115)</i>                                                             |             |
| <i>Male 53% (85),</i>                                                               |             |
| <i>Chi.sq. 1.943, 1df, P=0.163 ns</i>                                               |             |
| <i>Age 16-44 54% (40),</i>                                                          |             |
| <i>45-64 55% (78),</i>                                                              |             |
| <i>65+ 61% (82),</i>                                                                |             |
| <i>Chi-sq. 1.193, 2 df, P=0.551 ns</i>                                              |             |
| <i>Spearman's correlation with</i>                                                  |             |
| <i>continuous age: r=-0.349**</i>                                                   |             |
| <b>In last 4 weeks have you suffered from anxiety, nerves or depression at all?</b> |             |
| <b>1 No, not at all</b>                                                             | 70 (727)    |
| <b>2 Yes slightly</b>                                                               | 21 (215)    |
| <b>3 Yes, moderately</b>                                                            | 6 (66)      |
| <b>4 Yes, extremely</b>                                                             | 3 (31)      |

|                                                                                                                                                                                                                                                                                                                                                                 |             |
|-----------------------------------------------------------------------------------------------------------------------------------------------------------------------------------------------------------------------------------------------------------------------------------------------------------------------------------------------------------------|-------------|
|                                                                                                                                                                                                                                                                                                                                                                 | <b>1039</b> |
| <p><i>Mean (standard deviation):</i></p> <p><i>Female 1.43 (0.723),</i><br/> <i>Male 1.34 (0.683),</i><br/> <i>2-tailed t-test: 2.007; P= 0.006</i></p> <p><i>Age &lt;65 1.39 (0.694),</i><br/> <i>Age 65+ 1.39 (0.747),</i><br/> <i>2-tailed t-test: -0.030; P=0.976</i></p> <p><i>Spearman's correlation with</i><br/> <i>continuous age: r=0.028</i></p>     |             |
| <b>If you need any practical help doing everyday chores, how many people would help you if asked:</b>                                                                                                                                                                                                                                                           |             |
| <b>0</b>                                                                                                                                                                                                                                                                                                                                                        | 3 (28)      |
| <b>1</b>                                                                                                                                                                                                                                                                                                                                                        | 8 (79)      |
| <b>2</b>                                                                                                                                                                                                                                                                                                                                                        | 10 (107)    |
| <b>3</b>                                                                                                                                                                                                                                                                                                                                                        | 9 (88)      |
| <b>4</b>                                                                                                                                                                                                                                                                                                                                                        | 11 (111)    |
| <b>5</b>                                                                                                                                                                                                                                                                                                                                                        | 11 (116)    |
| <b>6</b>                                                                                                                                                                                                                                                                                                                                                        | 14 (146)    |
| <b>7</b>                                                                                                                                                                                                                                                                                                                                                        | 3 (30)      |
| <b>8+</b>                                                                                                                                                                                                                                                                                                                                                       | 31(314)     |
|                                                                                                                                                                                                                                                                                                                                                                 | <b>1019</b> |
| <p><i>Mean (standard deviation):</i></p> <p><i>Female 6.65 (5.894),</i><br/> <i>Male 7.19 (7.943),</i><br/> <i>2-tailed t-test: 1.234; P= 0.079 ns</i></p> <p><i>Age &lt;65 7.35 (7.371),</i><br/> <i>Age 65+ 5.25 (4.501),</i><br/> <i>2-tailed t-test: 4.033 P=0.001</i></p> <p><i>Spearman's correlation with</i><br/> <i>continuous age: r=-0.206**</i></p> |             |
| <b>If you had a serious personal crisis, how many people do you feel you could turn to for comfort and support:</b>                                                                                                                                                                                                                                             |             |
| <b>0</b>                                                                                                                                                                                                                                                                                                                                                        | 2 (18)      |
| <b>1</b>                                                                                                                                                                                                                                                                                                                                                        | 7 (70)      |
| <b>2</b>                                                                                                                                                                                                                                                                                                                                                        | 13 (130)    |
| <b>3</b>                                                                                                                                                                                                                                                                                                                                                        | 11 (117)    |
| <b>4</b>                                                                                                                                                                                                                                                                                                                                                        | 12 (122)    |
| <b>5</b>                                                                                                                                                                                                                                                                                                                                                        | 12 (126)    |
| <b>6</b>                                                                                                                                                                                                                                                                                                                                                        | 14 (141)    |
| <b>7</b>                                                                                                                                                                                                                                                                                                                                                        | 2 (24)      |
| <b>8+</b>                                                                                                                                                                                                                                                                                                                                                       | 27 (285)    |
|                                                                                                                                                                                                                                                                                                                                                                 | <b>1033</b> |
| <p><i>Mean (standard deviation):</i></p> <p><i>Female 6.57 (5.155),</i><br/> <i>Male 6.97 (6.657),</i></p>                                                                                                                                                                                                                                                      |             |

|                                                                                                                                               |             |
|-----------------------------------------------------------------------------------------------------------------------------------------------|-------------|
| 2-tailed t-test: 1.088; P= 0.009                                                                                                              |             |
| Age <65 7.04 (6.130),<br>Age 65+ 5.73 (4.810),<br>2-tailed t-test: 2.967; P=0.003                                                             |             |
| Spearman's correlation with<br>continuous age: r=-0.140**                                                                                     |             |
| <b>In the last 4 weeks have you gone to<br/>any clubs, community groups,<br/>organisations, education or<br/>recreation classes/meetings:</b> |             |
| <b>Yes</b>                                                                                                                                    | 45 (472)    |
| <b>No</b>                                                                                                                                     | 55 (571)    |
|                                                                                                                                               | <b>1043</b> |
| Yes:<br><br>Female 49% (277)<br>Male 44% (208),<br>Chi.sq. 2.565, 1df, P=0.109 ns                                                             |             |
| Age 16-44 49% (209),<br>45-64 41% (162),<br>65+ 51% (114),<br>Chi-sq. 7.726, 2 df, P=0.021                                                    |             |
| Spearman's correlation with<br>continuous age: r=0.025 ns                                                                                     |             |
| <b>In the last 4 weeks, have you gone to<br/>the cinema, theatre, concerts or other<br/>similar social entertainment?</b>                     |             |
| <b>Yes</b>                                                                                                                                    | 40 (419)    |
| <b>No</b>                                                                                                                                     | 60 (628)    |
|                                                                                                                                               | <b>1047</b> |
| Yes:<br><br>Female 41% (235),<br>Male 41% (193),<br>Chi.sq. 0.029, 1df, P=0.864 ns                                                            |             |
| Age 16-44 51% (219),<br>45-64 39% (153),<br>65+ 25% (58),<br>Chi-sq. 43.699, 10df, P=0.001                                                    |             |
| Spearman's correlation with<br>continuous age: r=0.233**                                                                                      |             |
| <b>In the last 4 weeks, have you taken<br/>part in keep fit, swimming, sport,<br/>dancing, exercise classes, walking for<br/>exercise?</b>    |             |
| <b>Yes</b>                                                                                                                                    | 63 (659)    |
| <b>No</b>                                                                                                                                     | 37 (381)    |
|                                                                                                                                               | <b>1040</b> |
| Yes:                                                                                                                                          |             |

|                                                                                                                                                                                                                                                                                            |            |
|--------------------------------------------------------------------------------------------------------------------------------------------------------------------------------------------------------------------------------------------------------------------------------------------|------------|
| <p>Female 63% (356),<br/>Male 67% (317),<br/>Chi.sq. 2.222, 1df, P=0.136 ns</p> <p>Age 16-44 73% (309),<br/>45-64 68% (261),<br/>65+ 46% (104),<br/>Chi-sq. 47.162, 2df, P=0.001</p> <p>Spearman's correlation with<br/>continuous age: r=0.220**</p>                                      |            |
| <p><b>AGE 65+ ONLY:- Compared to others, are your chances of going into care in the future:</b></p>                                                                                                                                                                                        |            |
| <b>1 Higher</b>                                                                                                                                                                                                                                                                            | 6 (26)     |
| <b>2 About the same</b>                                                                                                                                                                                                                                                                    | 48 (231)   |
| <b>3 Lower</b>                                                                                                                                                                                                                                                                             | 46 (219)   |
|                                                                                                                                                                                                                                                                                            | <b>476</b> |
| <p>Mean (standard deviation):</p> <p>Female 2.41 (0.608),<br/>Male 2.44 (0.546),<br/>2-tailed t-test: -0.515; P= 0.054</p> <p>Age &lt;65 2.41 (0.566),<br/>Age 65+ 2.43 (0.600),<br/>2-tailed t-test: -0.430; P=0.668</p> <p>Spearman's correlation with<br/>continuous age: r=0.045**</p> |            |

Due to sample weighting numbers do not necessarily =100%  
t-tests were for independent samples, 2-tailed tests; t-tests could only be performed on ranked or continuous variables (and with age dichotomised); for other variables Chi-square tests were performed and on 3-category age-groups ns: not statistically significant at least at the 0.05 level

1  
2  
3  
4  
5  
6  
7  
8  
9  
10  
11  
12  
13  
14  
15  
16  
17  
18  
19  
20  
21  
22  
23  
24  
25  
26  
27  
28  
29  
30  
31  
32  
33  
34  
35  
36  
37  
38  
39  
40  
41  
42  
43  
44  
45  
46  
47  
48  
49  
50  
51  
52  
53  
54  
55  
56  
57  
58  
59  
60

| <b>Supplementary file Table 4. Well-being by age-group and sex</b> |                             |                      |                      |                           |                      |                      |
|--------------------------------------------------------------------|-----------------------------|----------------------|----------------------|---------------------------|----------------------|----------------------|
|                                                                    | <b>Females by age group</b> |                      |                      | <b>Males by age group</b> |                      |                      |
|                                                                    | <b>16-44</b>                | <b>45-64</b>         | <b>65+</b>           | <b>16-44</b>              | <b>45-64</b>         | <b>65+</b>           |
|                                                                    | <i>Mean<br/>(sd)</i>        | <i>Mean<br/>(sd)</i> | <i>Mean<br/>(sd)</i> | <i>Mean<br/>(sd)</i>      | <i>Mean<br/>(sd)</i> | <i>Mean<br/>(sd)</i> |
| <b>Self-rated well-being overall</b>                               | 1.79<br>(0.799)             | 1.92<br>(0.909)      | 1.93<br>(0.888)      | 1.84<br>(0.765)           | 1.85<br>(0.850)      | 1.87<br>(0.772)      |
| <i>Total mean<br/>(sd) 1.86<br/>(0.833)</i>                        |                             |                      |                      |                           |                      |                      |
| <b>Self-rated mental well-being</b>                                | 1.75<br>(0.781)             | 1.82<br>(0.839)      | 1.80<br>(0.785)      | 1.74<br>(0.804)           | 1.79<br>(0.771)      | 1.78<br>(0.803)      |
| <i>Total mean<br/>(sd)<br/>1.78<br/>(0.796)</i>                    |                             |                      |                      |                           |                      |                      |
| <b>Life satisfaction rating</b>                                    | 7.98<br>(1.614)             | 7.84<br>(0.111)      | 7.90<br>(1.799)      | 7.68<br>(1.636)           | 7.81<br>(1.594)      | 8.01<br>(0.161)      |
| <i>Total mean<br/>(sd)<br/>7.84<br/>(1.644)</i>                    |                             |                      |                      |                           |                      |                      |
| <b>Happy rating</b>                                                | 1.50<br>(0.586)             | 1.61<br>(0.562)      | 1.61<br>(0.654)      | 1.64<br>(0.622)           | 1.63<br>(0.596)      | 1.57<br>(0.578)      |
| <i>Total mean<br/>(sd)<br/>1.59<br/>(0.598)</i>                    |                             |                      |                      |                           |                      |                      |
| <b>Self-rated quality of life</b>                                  | 1.77<br>(0.729)             | 1.89<br>(0.811)      | 1.85<br>(0.845)      | 1.79<br>(0.744)           | 1.90<br>(0.798)      | 1.82<br>(0.687)      |
| <i>Total mean<br/>(sd)<br/>1.84<br/>(0.771)</i>                    |                             |                      |                      |                           |                      |                      |
| <b>No. of respondents 1018-1035</b>                                |                             |                      |                      |                           |                      |                      |

*sd standard deviation*

**Supplementary Table 5. Spearmans rank correlations with self rated well-being and mental well-being – health, functioning, social participation and support, and socio-demographic/economic characteristics:**

|                                                                                                                          | <b>Well-being</b> | <b>Mental well-being</b> |
|--------------------------------------------------------------------------------------------------------------------------|-------------------|--------------------------|
| <b>Self-rated health status longer response scale &amp; compared to others</b>                                           | 0.550**           | 0.433**                  |
| <b>Able to walk 400 yards</b>                                                                                            | 0.338**           | 0.217**                  |
| <b>Longstanding illness, disability or infirmity</b>                                                                     | -0.333**          | -0.237**                 |
| <b>Able to do heavy housework</b>                                                                                        | 0.340**           | 0.219                    |
| <b>Able to go shopping and carry heavy bags</b>                                                                          | 0.348**           | 0.231**                  |
| <b>Able to go up/down steps and stairs</b>                                                                               | 0.324**           | 0.201**                  |
| <b>In last 4 weeks, suffered from anxiety, nerves or depression</b>                                                      | 0.318**           | 0.399**                  |
| <b>Number of people who would help if needed with everyday chores</b>                                                    | -0.193**          | -0.156**                 |
| <b>Number of people could turn to for comfort/support</b>                                                                | -0.196**          | -0.162**                 |
| <b>In the last 4 weeks gone to any clubs, community groups, organisations, education or recreation classes/meetings:</b> | 0.107**           | 0.130**                  |
| <b>In the last 4 weeks gone to cinema, theatre, concerts or similar</b>                                                  | 0.116**           | 0.070*                   |
| <b>In last 4 weeks taken part in</b>                                                                                     | 0.252**           | 0.183**                  |

|                                                      |          |          |
|------------------------------------------------------|----------|----------|
| exercise etc                                         |          |          |
| <b>Compared to others chances of going into care</b> | -0.156** | -0.170** |
| <b>Housing tenure</b>                                | 0.125**  | 0.098**  |
| <b>Household size</b>                                | -0.130** | -0.120** |
| <b>Number of adults in household</b>                 | -0.149** | -0.139** |
| <b>Sex</b>                                           | 0.002    | 0.018    |
| <b>Age - continuous</b>                              | 0.047    | 0.037    |
| <b>Highest level of education</b>                    | 0.101**  | 0.098**  |
| <b>Age finished FT education</b>                     | -0.078** | -0.106** |
| <b>General health status short response scale</b>    | 0.481**  | 0.356**  |
| <b>NS-SEC all categories</b>                         | 0.075**  | 0.042    |
| <b>NS_SEC 8 categories</b>                           | 0.081**  | 0.050    |
| <b>Annual gross income</b>                           | -0.113** | -0.065*  |

\*  $p < 0.05$ ; \*\*  $p < 0.01$

*Inverse correlations reflect different directions of coding*
